# Supplementary material
Source: publisher site journal article supplement (https://www.dovepress.com/article/417840)
Supplement: Supplementary file 1 [file get_supplementary_file.php]

**Supplement Table 1.** Clinical and mycological characteristics of patients harbored azole-resistant isolates in this study.

| Case | Gender, Age (y) | Underlying disease | Clinical Diagnoses | Hospital admission  /ICU admission | Prior azole therapy | Treatment and Outcome | Isolate | MIC (ug/mL) for | | | cyp51A mutation | CSP1 type |
| --- | --- | --- | --- | --- | --- | --- | --- | --- | --- | --- | --- | --- |
| POS | VOR | IZ |
| 1 | M, 48 | Liver failure, Severe hepatitis | Probable IA | Y/Y | N | Treated with voriconazole. Died of liver failure and respiratory failure | *A.fumigatus*  P3-27224 | 1 | 1 | >16 | N248K | t01 |
| 2 | F, 69 | Liver transplantation, chronic renal failure | Probable IA | Y/Y | N | Treated with voriconazole and caspofungin. Died of respiratory failure and septic shock | *A.fumigatus*  P13-27328-1 | 1 | 8 | >16 | TR34/L98H | t02 |
| *A.fumigatus*  P13-27328-2 | 2 | >8 | >16 | TR34/L98H | t02 |
| 3 | F, 72 | Heart transplantation, Chronic renal failure, Autoimmune diseases, Diabetes | Probable IA | Y/Y | N | Treated with voriconazole and caspofungin. Died of respiratory infection and multi-organ failure | *A.fumigatus*  P24-27030 | 1 | 8 | >16 | TR34/L98H | t02 |
| 4 | F, 70 | Bronchiectasis | CPA | N/N | Voriconazole | Treated with posaconazole. Visited as a regular outpatient, improved with cavity closure | *A.fumigatus*  P53-27660 | 0.5 | 1 | 1 | Wild type | t04A |
| 5 | M, 76 | Chronic renal failure, Autoimmune disease, JP, and CMV infection | Probable IA | Y/N | N | Treated with posaconazole and caspofungin. Visited as a regular outpatient, improve with lung lesion absorption | *A.fumigatus*  P81-27727 | 1 | >8 | 1 | TR46/  Y121F/  T289A | t01 |
| 6 | M, 21 | Bronchiectasis | ABPA | N/N | itraconazole | Treated with posaconazole. Visited as a regular outpatient, reduced pulmonary symptoms | *A.fumigatus*  P82-27759 | 1 | 4 | >16 | TR34/L98H | t11 |
| 7 | M, 72 | Bronchiectasis | CPA | Y/N | Voriconazole and itraconazole | Treated with posaconazole and caspofungin. Visited as a regular outpatient, improved with lung lesion absorption | *A.niger* complex  O15-27838 | 1 | 8 | >16 | Not done | Not done |
| 8 | M, 54 | Autoimmune disease | CPA | Y/N | Voriconazole | treated with voriconazole. Visited as a regular outpatient, reduced pulmonary symptoms | *A.oryzae*  O20-27329 | 0.5 | 4 | 0.5 | Not done | Not done |

Supplement Table 2. Comparison of the prevalence of CSP subtypes among different studies.

| CSP1 subtypes | Country, year of publication | | | | | | | | | | |
| --- | --- | --- | --- | --- | --- | --- | --- | --- | --- | --- | --- |
| This study | China 2016 63 | China 2013 34 | Germany 2021 61 | Mexico 2020 65 | Argentina 2020 65 | Iran 2018 64 | Span 2016 67 | Netherlands 2012 68 | Netherlands 2009 33 | Australia 2009 66 |
| Clinical (81) | Clinical and environmental (163) | Clinical (162) | Clinical (122) | Clinical and environmental (54) | Clinical and environmental (29) | Clinical and environmental (79) | Clinical (175) | Clinical and environmental (117) | Clinical (209) | Clinical and environmental (122) |
| t01 | 53.1 | 34.5 | 11.7 | 19.7 | 12.9 | 6.8 | 25.3 | 22.3 | 16.2 | 37.3 | 21.3 |
| t02 | 6.2 | 9.8 | 9.9 | 11.5 | 12.9 | 10.3 | 7.6 | 18.3 | 14.5 | 10 | 7.4 |
| t03 | 6.2 | 12.9 | 20.4 | 35.2 | 7.4 | 27.5 | 20.3 | 10.9 | 6.8 | 11 | 23.8 |
| t04A | 28.4 | 25.8 | 31.5 | 10.7 | 38.8 | 41.3 | 45.6 | 22.9 | 14.5 | 17.2 | 28.7 |
| t04B | - | - | - | - | - | - | - | 2.3 | 17.1 | 1 | - |
| t05 | - | 0.6 | 1.2 | 11.5 | - | - | - | 2.9 | 1.7 | 9.1 | 1.6 |
| t06A | - | 1.8 | 3.1 | - | - | - | 2.5 | 11 | - | 0.5 | 2.5 |
| t06B | - | 0.6 | 5.6 | - | 14.8 | - | 1.3 | 2.3 | - | - | 0.8 |
| t07 | - | - | - | - | - | - | - | - | - | 0.5 | - |
| t08 | - | - | - | 2.5 | - | - | 1.3 | 2.9 | 4.3 | 3.3 | - |
| t09 | - | - | - | 1.6 | - | - | - | 1.1 | 0.9 | 1.9 | 2.5 |
| t10 | 1.2 | 4.3 | 3.7 | 3.3 | 5.5 | - | 3.8 | 0.6 | 0.9 | 1 | 1.6 |
| t11 | 1.2 | - | - | - | - | - | - | 4 | 12.2 | 1.9 | - |
| t12 | - | 0.6 | 1.9 | - | - | - | - | - | - | 0.5 | - |
| t13 | - | - | - | 0.8 | 5.5 | - | - | 1.1 | 1.7 | 0.5 | 1.6 |
| t14 | - | 0.6 | - | 2.5 | 1.8 | 3.4 | - | 2.3 | 0.9 | 2.9 | 0.8 |
| t15 | - | - | - | 0.8 | - | - | - | 0.6 | - | 0.5 | - |
| t16 | 2.5 | - | - | - | - | - | - | - | - | 0.5 | - |
| t17 | - | 0.6 | 0.6 | - | - | - | - | - | - | 0.5 | 0.8 |
| t18A | - | - | - | - | - | - | 1.3 | 1.1 | 0.9 | - | 1.6 |
| t18B | - | 2.5 | 1.9 | - | - | - | 1.3 | 0.6 | - | - | - |
| t19 | - | 2.5 | - | - | - | - | - | 1.1 | - | - | 4.1 |
| t20 | - | - | - | - | - | - | - | - | - | - | 0.8 |
| t21 | - | - | 0.6 | - | - | - | - | - | - | - | - |
| t22 | - | 1.2 | 4.9 | - | - | - | 1.3 | - | - | - | - |
| t23 | - | - | 0.6 | - | - | - | - | - | - | - | - |
| t24 | - | - | 0.6 | - | - | - | - | - | - | - | - |
| t25D | - | - | - | - | - | 3.4 | - | - | - | - | - |
| t25G | - | - | - | - | - | - | - | 0.6 | - | - | - |
| t26 | - | 0.6 | - | - | - | 6.8 | - | 0.6 | - | - | - |
| t27 | - | - | - | - | - | - | - | 0.6 | - | - | - |
| Simpson’s Diversity Index* | 0.64 | 0.78 | 0.83 | 0.80 | 0.80 | 0.76 | 0.78 | 0.85 | 0.86 | 0.80 | 0.81 |
